# Supplementary material
Source: Springer Nature journal article supplement (https://www.springermedizin.de/resource/supplementary/12985_2013_2365_MOESM2_ESM.pdf/9606916)
Supplement: MOESM2 [file 9606916]

**A**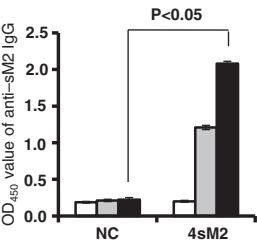**B**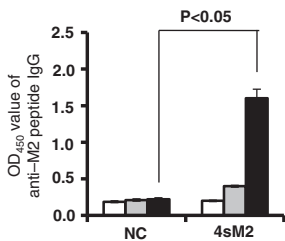**C**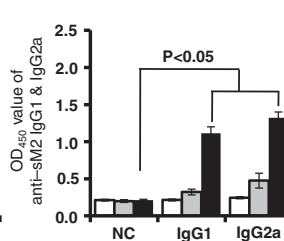**D**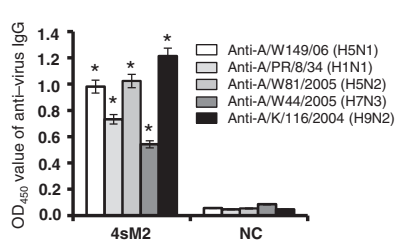

□: Pre-immune    □: 1<sup>st</sup> immunization    ■: 2<sup>nd</sup> immunization

**E**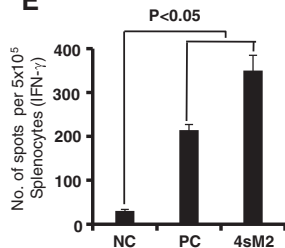

sM2 Protein stimulation

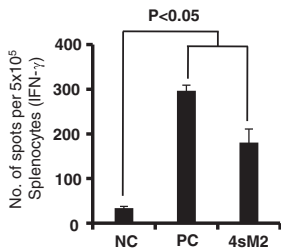

M2 peptide stimulation

**F**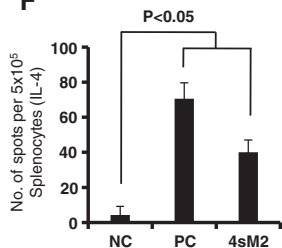

sM2 Protein stimulation

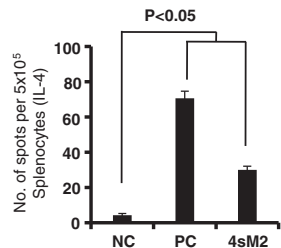

M2 peptide stimulation
